**Exercising for food: bringing the laboratory closer to nature**

Ivana A.T. Fonseca<sup>1</sup>; Renata L.F. Passos<sup>1</sup>; Fernanda A. Araújo<sup>2</sup>; Milene R.M. Lima<sup>1</sup>; Débora R. Lacerda<sup>1</sup>; Washington Pires<sup>1</sup>; Danusa D. Soares<sup>1</sup>; Robert, J. Young<sup>3,4\*</sup>; Luiz Oswaldo C. Rodrigues<sup>1</sup>

<sup>1</sup>Laboratório de Fisiologia do Exercício da Escola de Educação Física Fisioterapia e Terapia Ocupacional da Universidade Federal de Minas Gerais, Campus Pampulha, Belo Horizonte, Minas Gerais 31270-901, Brazil

<sup>2</sup>Instituto de Ciências Biomédicas, Área de Ciências Fisiológicas, Universidade Federal de Uberlândia, Av. Pará, 1720, Campus Umuarama, CEP: 38400-678, Uberlândia - MG, Brazil

<sup>3</sup>Pontifícia Universidade Católica de Minas Gerais, Postgraduate Program in Zoology, Coração Eucarístico, Belo Horizonte 30610-535, Brazil

<sup>4</sup>School of Environment and Life Sciences, Peel Building, University of Salford Manchester, Salford M5 4WT, UK

\*Corresponding author: [r.j.young@salford.ac.uk](mailto:r.j.young@salford.ac.uk)

Running title: Running contingent on food rewards

## 22 SUMMARY

23 Traditionally, exercise physiology experiments have borne little resemblance to how animals  
 24 express physical activity in the wild. In this experiment, 15 adult male rats were divided into  
 25 three equal-sized groups: exercise contingent (CON), non-exercise contingent (NON) and  
 26 sedentary (SED). The CON group was placed in a cage with a running wheel, where the  
 27 acquisition of food was contingent upon the distance run. Every three days the distance  
 28 required to run to maintain food intake at free feeding levels was increased by 90% in  
 29 comparison to the previous 3 days. The NON group were housed identically to the CON  
 30 group, but food acquisition was not dependent upon running in the wheel. Finally, the SED  
 31 group were kept in small cages with no opportunity to perform exercise. A two-way ANOVA  
 32 with repeated measures was used to determine significant differences in responses  
 33 between the experimental phases and treatment groups and ANCOVA to analyse growth  
 34 and tissue mass variables with body length and body mass used separately as covariates. A  
 35 *post hoc* Tukey's test was used to indicate significant differences. A Pearson's correlation  
 36 was used to test the relationship between the distance travelled by the animal and the  
 37 distance/food ratio. The level of significance was set at  $p < 0.05$  for all tests. The CON group  
 38 showed the hypothesized correlation between distance required to run to obtain food and  
 39 their mean distance travelled ( $p < 0.001$ ), during 45 days in contingency phase. The CON  
 40 group showed a decrease in body mass, rather than an increase as shown by NON and SED  
 41 groups. The CON group had a significantly lower body temperature ( $p < 0.05$ ) and adiposity  
 42 ( $p < 0.05$ ) when compared to the other two groups for the same body size. The present  
 43 experimental model based on animals choosing the characteristics of their physical exercise  
 44 to acquire food (i.e., distance travelled, speed and duration) clearly induced physiological  
 45 effects (body characteristics and internal temperature), which are useful for investigating  
 46 relevant topics in exercise physiology such as the link between exercise, food and body  
 47 weight.

48

49 Key words: feeding behaviour; motivation; progressive ratio; running wheel; voluntary  
 50 exercise.

## 51 INTRODUCTION

52 Traditionally experiments in exercise physiology have been different from the  
 53 conditions in which wild animals would undertake physical activity. For example, most  
 54 experiments are conducted in highly controlled laboratory environments in which the  
 55 animals are, often, forced to exercise stimulated by electric shocks on a treadmill  
 56 (Tokuyama et al., 1982; Lambert et al., 1996; Lima et al., 1998; Soares et al., 2003). Thus,  
 57 experiments are controlled and convenient for the human experimenter, but they do not  
 58 allow the simulation of the relationship that a wild animal has between its need for  
 59 resources and how it acquires those resources. It is possible that being put on a treadmill  
 60 with the threat of an electric shock, if the animal does not run, is a stressful experience and  
 61 one in which the animal has no choice, as observed by Fleshner et al. (2007).

62 Psychologists have established that the performance of behaviour is enhanced  
 63 through the use of positive reinforcement, whereas punishment is not an effective  
 64 mechanism for modifying behaviour (Mazur, 2002). In the wild, resource acquisition by  
 65 animals is normally contingent upon them expressing physical activity: a hungry rat must go  
 66 out and seek food (i.e., express physical activity) (Russel et al., 1987; Overton and Williams,  
 67 2004; Duffy et al., 1997; Challet et al., 1997; Krebs et al., 2012). Thus, for most wild animals  
 68 the obtaining of resources is contingent upon the expression of physical activity (i.e.,  
 69 appetitive behaviour; Young, 1997). Importantly, wild animals have control over when,  
 70 where and how much physical activity (e.g., duration and speed) they will express in order  
 71 to obtain desired resources. It is this control that contributes significantly to the well-being  
 72 of animals both in the wild and in captivity (Young, 2003) and, probably, it is the lack of  
 73 control (i.e., ability to express appetitive behaviour in a manner that affects their  
 74 environment) that animals in traditional exercise physiology experiments face. Wild animals  
 75 live in an operant world (i.e., they operate on the world using their behaviour to obtain  
 76 resources such as food) and gain control over it by expressing behaviour (Young, 1997). The  
 77 application of different operant ratio types (i.e., whether it is expressing a certain frequency  
 78 or duration of behaviour that will result in resource acquisition) can be used to simulate  
 79 situations in the wild, for example, a progressive ratio can simulate increasing food scarcity;  
 80 that is, more work required to obtain the same amount of food (Mazur, 2002).

In behavioural ecology, one of the fundamental concepts is that animals express behaviour in a manner that provides them with the greatest net return (Krebs et al., 2012). In other words, animals try to maximise the cost-benefit ratio in terms of energy intake, and this concept is the basis of optimal foraging theory, one of the corner stones of behavioural ecology, which has received considerable empirical support (Krebs et al., 2012). However, animals being forced to run on a treadmill due to electric shocks are unable to maximise the cost-benefit ratio, as even basic factors affecting energy consumption such as running speed and duration are out of their control. Thus, this traditional experimental model does not relate closely to the reality of wild animals' lives. It is, after all, the choices that animals make, which affects their fitness and upon which natural selection acts (Careau and Garland, 2012; Swallow et al., 2009). Other experimental models may approach the decisions that animals deal with in the wild by considering some choices of animals to perform the exercise, such as the relationship between energy expenditure and time spent seeking and obtaining a certain amount of food (Rowland et al., 2008).

The theoretical model of energy homeostasis considers the control of body mass because of the balance between energy cost of activity performed for obtaining food, basal metabolism and energy value of the food obtained (Gelegen et al., 2006). Therefore, there is a natural link between physical activity and feeding. This link has been assessed using experimental protocols, which isolate the effects of one factor such as the effect of exercise on caloric intake (Tokuyama et al., 1982; Stubbs et al., 2002) or the effect of energy on the amount of exercise performed (Belke et al., 2004; Kanarek et al., 2009). Nevertheless, in the exercise protocols usually used exercise is driven by: threat of electrical stimulation on a treadmill (rodents); survival in water tanks (rodents); or verbal encouragement on a treadmill or exercise bicycle (humans). Even protocols that utilize voluntary exercise, performed on a running wheel, the exercise is usually not contingent upon the provision of food and, therefore, it is observed that some species, including rats, will voluntarily perform physical activities without an apparent function (Sherwin, 1998; Meijer and Robbers, 2014), which alters various aspects of physiology and behaviour, such as their caloric intake (Novak et al., 2012). It is known that rats and mice exhibit abnormal behaviour when subjected to caloric restriction protocols with free access to the wheel (i.e., obsessive wheel running;

Sherwin, 1998); and this behaviour has been associated with anorexia nervosa (Routtenberg and Kuznesof 1967, Altemus et al., 1993, Burden et al., 1993).

In the laboratory, few studies have linked the provision of food to the amount of physical activity performed. Perrigo and Bronson (1983), for example, pioneered the use of this method; they investigated the effect of increasing the cost of foraging on the reproductive capacity of mice *Mus musculus* (females). Vaanholt et al. (2007) using the same experimental model in mice, observed that animals selected for high activity levels ran about 28% more than the control group when there was no contingency between physical activity and food. When the food was contingent upon exercise, the two groups travelled similar distances ( $23.2 \pm 1.4$  versus  $23.4 \pm 1.4$  km/day, respectively). This result suggests that when animals need to perform exercise to acquire food, the intrinsic differences between individuals mentioned above (such as selection for high levels of activity) may not be decisive in their performance – instead hunger is the key determinant.

The aim of this study was to verify the effect of increasing physical exercise (distance travelled and speed) required to obtain the same amount of food on the anthropometrical (body mass, growth, tissue mass) and physiological parameters (core temperature) of rats *Rattus norvegicus*.

## RESULTS

As hypothesized, the mean daily distance travelled by the CON group increased throughout the experiment from  $1311 \pm 275$  m during adaptation (phase 2) to  $9037 \pm 1033$  m on day 42 (phase 3), and an overall mean of  $6132 \pm 757$  m during the experimental phase. This was a 589% increase compared to the spontaneously distance travelled by the animals during the adaptation period (phase 2). As expected, there was a correlation between the distance required to obtain food and the distance travelled by the animals ( $r = 0.86$ ;  $p < 0.001$ ).

For the NON group there was no significant difference in spontaneously travelled distance over the time of the experiment (overall mean  $1068 \pm 95$  m). In the last three days of the experiment the distance travelled by the CON group was 5.6 times higher than NON group ( $9037 \pm 1033$  m versus  $1621 \pm 782$  m, respectively) (Figure 1a; mean  $\pm$  SE).

It can be seen in Figure 1b (mean±SE) that the SED group and the NON group body masses steadily increased during the experiment (311.4±6.8 versus 296.5±7.3 g on day -16 (phase 1) to 422.4±9.1 versus 407.4±12.5 g on the last day of phase 3, for the SED and NON groups, respectively). The CON group, in comparison, had a stable body mass until day 24 (phase 3) (332.5±1.8 g) followed by a progressive reduction until day 42 (279.4±4.9 g), when the animals reached a 16% reduction in body mass in relation to their phase 3 stable body mass (Figure 2; mean±SE). On day of euthanasia, the CON group had lower body mass compared to NON and SED (269.2±7.0, 413.4±13.2, and 426.9±7.7 g, respectively, mean±SE). Furthermore, on the same day, there was no difference between groups in body length without or with body mass as a covariate ( $P>0.05$  in both cases; 162.5±4.9, 172.4±4.4, and 162.5±4.9 mm, for CON, NON and SED, respectively, without body mass as a covariate or 157.4±14.7, 174.7±7.8 and 165.6±9.9 mm with body mass as a covariate) (mean±SE).

Figure 2c (mean±SE) shows that only the CON group progressively reduced the amount of food ingested (25.0±0.9 phase 1 versus 13.8±1.0 g in phase 3; which is minus 44.8%). In groups NON and SED there was no change in food intake during the experiment (24.7±0.1 versus 24.2±0.1 g, respectively).

Figure 3 (mean±SD) shows a colonic temperature reduction in the CON group throughout the experiment in relation to the other groups, which occurred mainly from day 24 onwards (36.5±0.2 versus 37.5±0.1 versus 37.0±0.1 °C on day 24 for CON, NON and SED, respectively). This was also seen when the CON group's first colonic temperature (phase 1 = 37.8±0.1 °C) was compared to its last one (phase 3 = 36.4±0.1 °C).

The CON group increased running speed to obtain food (from 18.4±2.1m/min on the first progressive ratio to 35.2±3.3m/min on the last progressive ratio), which was higher than NON group ( $p<0.05$ ). However, these running speed increases were not enough to compensate the energy demands, leading to the rats also to increase total exercise time on the wheel (from 71.25 min at the beginning to 256.74 min at the end of the experiment). To maintain a running time of 71.25 min rats in the CON group would have needed to run at 126.8 m/min during the last progressive ratio, which would be faster than their spontaneous maximum-recorded running speed. Interestingly, the maximum spontaneous running

speeds recorded were similar for CON ( $81.6 \pm 1.7$  m/min) and NON groups ( $99.5 \pm 1.2$  m/min) during phase 3 (data are mean  $\pm$  SE).

Intrinsic differences in running speed between groups were not observed, because speed and exercise time in the progressive conventional treadmill tests showed no differences among groups both in the pre and post testing ( $p > 0.05$ ; Table 1; mean  $\pm$  SD).

Food contingent on exercise (i.e., the CON group) did not affect the final body length of the animals ( $p > 0.05$ ) ( $163 \pm 10$  versus  $172 \pm 10$  mm versus  $163 \pm 9$  mm for groups CON, NON and SED, respectively, mean  $\pm$  SD) nor the mass of femurs ( $p > 0.05$ ) (Table 2; mean  $\pm$  SD). The length of the right femur was significantly shorter in the CON group compared to the others ( $p < 0.05$ ) (Table 2; mean  $\pm$  SD). There was no influence of body length for mass of femurs, but when body length was accounted for as a covariate, the length of right femur of the CON group was shorter compared only to SED group (Table 2; mean  $\pm$  SD).

The CON group showed smaller masses of brown adipose tissue, liver, heart and right gastrocnemius compared to NON and SED groups. The right adrenal gland was heavier in the NON compared to the other groups. There was no difference between groups in the mass of the soleus (Table 2; mean  $\pm$  SD). When body length was considered as covariate, liver and heart showed smaller masses in CON group compared to NON and SED groups. The right gastrocnemius was heavier in NON group compared to CON and SED groups, and the right adrenal gland was heavier in the NON compared to the CON group. There was no difference between groups in the mass of the brown adipose tissue and soleus (Table 2, adjusted means; mean  $\pm$  SD).

No difference between the groups in growth or tissue mass data was found when body mass was considered as covariate, except for the adiposity index ( $0.64 \pm 0.25$  versus  $2.96 \pm 0.78$  versus  $3.15 \pm 1.03\%$  for the groups CON, NON and SED, respectively; Figure 3a; mean  $\pm$  SD) and adipocyte area ( $1376.5 \pm 331.0$  versus  $3588.6 \pm 685.2$  versus  $3850.1 \pm 630.6 \mu\text{m}^2$  for the groups CON, NON and SED, respectively, Figures 3b, c, d and e). In other words, adiposity was lower in the CON group compared to NON and SED groups ( $p < 0.05$ ; mean  $\pm$  SD).

## 199 DISCUSSION

200        These results demonstrate that rats will travel increasingly longer distances to  
 201 acquire food, as is expected to happen under natural conditions, during conditions of  
 202 decreasing food availability. Vaanholt et al. (2007) observed similar results in mice  
 203 selectively bred for high activity levels on running wheels. Foraging is a complex behaviour  
 204 that depends on factors such as food availability, presence of predators, time and energy  
 205 expenditure involved in seeking and obtaining food, animal age, species, among others. In  
 206 nature all these factors may be present, either singly or combined, and the animal's  
 207 behaviour is the result of the costs and benefits generated by this behaviour (Houston and  
 208 McNamara, 1989; Lemon; Barth, 1992; Shamoun-Baranes; van Loon, 2006; Young and  
 209 Lawrence, 1996), as well as possible intrinsic motivation to be physically active (e.g., see  
 210 Meijer and Robbers, 2014 and references therein). The data recorded indicate that the  
 211 present contingency method allows the experimenter to precisely control the daily distance  
 212 to be travelled by the animal through manipulating the relationship between the amounts  
 213 of food given as a function of distance required to obtain it. Furthermore, it was found that:  
 214 (1) the amount of exercise performed voluntarily by the animal is five times higher when  
 215 obtaining food is contingent on physical activity; (2) the motivation to perform physical  
 216 activity, as demonstrated by greater daily distance travelled, is greater in animals subject to  
 217 food-exercise contingency; and (3) animals submitted to a food-exercise contingency  
 218 reached a stable body mass, whereas those without showed progressive increase. The use  
 219 of the present experimental model may change our understanding of the impact of exercise  
 220 in various relevant issues to exercise physiology such as control of body weight and physical  
 221 activity; thermoregulation and exercise; pregnancy and physical activity; sleep and physical  
 222 activity, amongst others.

223        Another important observation of this study was that using a progressive ratio of the  
 224 distance to be travelled by the animals to obtain food (for 42 days) reduced the variability of  
 225 distance travelled. Several studies have shown that when there is no contingency between  
 226 physical activity and food, the distances travelled by rodents may exhibit high coefficients of  
 227 variation (Chappell et al., 2004, 2007). Lambert and Noakes (1990), for example, observed  
 228 that the distance travelled by rats ranged widely between 3.3 and 76.0 km/week. In the  
 229 present work, the variability in CON group distance ran was reduced by 49% when



compared to the period of adaptation in activity cages (phase 2). The coefficient of variation was also lower in the CON group compared to the NON group (24% vs 59%, during phase 3). This reduction in the variability of distance ran suggests that animals of the same species travel similar distances when they are motivated to run for food, and that this behaviour can be independent of age-related differences (Mondon et al., 1985), sex (Garland et al., 2011) and aerobic capacity (Vanholt et al., 2007), whose effects are observed when animals perform exercise without it being rewarded with food. Thus, our results show that the contingent method decreased the interference of intrinsic and extrinsic factors on the exercise performance variability by the animals under the present restricted and controlled experimental situation, which could be useful for drug experimental studies, for example. However, in the wild, in the case of food shortage, other factors such as predation risk (or other environmental challenges) or minimal differences in age, sex and the intrinsic physical ability of the animal may be crucial for survival.

In relation to the traditionally used method to study physical exercise in animals (i.e., forced exercise on a treadmill), it is interesting to compare the coefficient of variation of the total exercise time in this type of exercise with the mean distance travelled in the present study. In previous studies from our laboratory, we found a coefficient of variation of 42% in total time of forced exercise on a treadmill at 18m/min (Pires et al., 2007), which is a moderate exercise for rats, compared to the coefficient of approximately 20% for the total distance travelled in the CON group of the present study. It is therefore reasonable to assume that there is less variability in animal motivation when exercise was linked to obtaining food (i.e., positive reinforcers compared to electrical stimuli (i.e., punishment)).

In the laboratory, when the animals had free access to the running wheel, the NON group performed some physical activity without apparent reason. This behaviour was also observed in this investigation in the CON and NON groups, and its mechanism is unknown. Perhaps it is due to intrinsic exploratory behaviour of each animal (Inglis et al. 2001) and there are studies showing that certain genetic variants in some species are more active than others (Dewsbury, 1980; Swallow et al., 2009; Garland et al., 2011).

Our results showed that exercise linked to food caused changes in rats' body composition. The CON group adiposity index was approximately 80% lower when compared

to the NON and SED groups. Similar results were found by Vaanholt et al. (2007) who observed a reduction in adipose tissue of approximately 70% in mice that ran for food (contingency was fixed at 90% of maximum) compared to the group that had free access to food and a running wheel. The effect of the food-exercise contingency on adipose tissue observed in this study and that of Vaanholt et al. (2007) are higher when compared to the effects of training conducted on a running wheel without such contingency (Tokuyama et al., 1982, Pitts, 1984; Cortright et al., 1997), on a treadmill (Lacerda, 2012; Barcellos, 2011; Pitts, 1984) or in restriction food protocols (Hill et al., 1985). The contingency of exercise to obtain food in the present study simulated a natural condition and caused a pronounced reduction in adipose tissue not observed in traditional protocols of exercise/training. Some of these results could be associated to higher daily energy expenditure for animals that have to run on wheels to get food as compared with those forced to run (even to exhaustion) on a motorized treadmill, even daily. Due to the caloric content of feed and the period of stability in body mass between days 3 and 24 (phase 3 in CON group), was possible to estimate the daily energy expenditure of the animals of the CON group, which was 73.6 kcal/day. It has been reported that rats with free access to the wheel (without contingency), spend, on average, 13 % of this in ingested food energy per day to run on the wheel (Afonso; Eikelboom, 2003). In this case, the animals of the present study consumed 9.56 kcal to traveled about 4673 m (average distance traveled by the animals during the period described above), or 2.04 kcal/km. This value is lower than 2.26 kcal/km observed by Afonso and Eikelboom (2003), but is in agreement with values reported for Wistar rats during a constant exercise on a treadmill at 18m/min for approximately 50 min (2.77 kcal/km) (Soares et al. 2003). These results suggest that per kilometre there were no differences in energy expenditure, but the distance travelled by the CON group was much greater than that observed in spontaneous wheel running rats or rats undergoing forced exercise on a treadmill. Thus, there may be important, long-term physiological changes in food contingent rats not found in the aforementioned protocols. This issue needs more investigation, but suggests that the natural link between exercise and food must be considered when the aim is to study body mass control, obesity and associated diseases.

Additionally, the initial stable body mass phase of CON rats may have been due to the use of stored fat reserves at the beginning of the experiment, when the cost of the

activity was still small. The weight reduction at the end of the experiment (which was not due to changes in body length), in turn, indicates the amount of energy obtained was not sufficient to maintain the body mass of rats. The linear relationship between distance ran and required to run to obtain *ad libitum* feeding level (figure 1, panel A) suggests that, if the progressive ratio had continued beyond DD<sub>max</sub> (day 42) that rats would have gone into an increasing energy deficit situation.

Lower body masses, due to smaller fat deposits may be an advantage for survival in nature, especially for those species that depend on the realization of physical activity to avoid predators or to obtain food. Investigations into the effects of domestication on the body composition of rats (Castle, 1947) and mice (Dohm et al., 1994) have reported that wild animals are smaller and perform better on a treadmill and running wheel when compared to domesticated animals. Although, the performance of the animals in the CON group was not different from the other groups when subjected to progressive treadmill test in present study, the observed alterations in body mass and the mass of the heart, liver, gastrocnemius and adrenal CON group suggest that the link between providing food and exercise can be a method that approximates the characteristics of laboratory animals from those observed in animals in nature.

The caloric intakes and body masses were not different when comparing the groups NON and SED. These results suggest that spontaneous physical activity of rats in NON group was not sufficient to cause changes in body mass. Afonso and Eikelboom (2003) found similar results. These authors found daily distances ranging between 841-3303 m in rats with free access to a running wheel without any contingency on food, distances similar to those observed in the NON group (mean 1068±95 m per day) in the present study. A continuous increase in body mass has been observed in mice that underwent training on a treadmill (Lacerda, 2012; Barcellos, 2011), in running wheels without food-exercise contingency and those without access to exercise (Cortright et al., 1997) as was observed in the NON and SED groups of the present study.

The data relating to the final length of the rats in this study, suggest that there was no effect of the contingency on the growth of rats. Cortright et al. (1997) found similar results when they measured the effect of nine weeks of free access to a running wheel, with

no contingency to the food supply. Rezende et al. (2006) observed a reduction in body length of animals that were selected for high levels of activity on running wheels in both males and females. These animals were artificially selected for 35 generations and the changes in body size may have represented an effect of exercise associated selection in relation to running wheels. The results observed in animals that have not been artificially selected for high levels of activity suggest that the increase in mass of the animals according to age is due to increased deposits of fat and not body growth as a whole.

The early days of running wheel access caused a reduction in food intake by the CON and NON groups. This suppression in caloric intake has been well documented in the literature in voluntary (Collier, 1970; Goodrick et al., 1983; Afonso and Eikelboom, 2003; Lattanzio and Eikelboom, 2003) and forced exercise (Richard and Rivest, 1989; Stevenson et al., 1966). Indeed, this behaviour appears to be independent of novelty (wheel presence) (O'Connor and Eikelboom, 2000), sex of animals (Tokuyama et al., 1982), age (Looy and Eikelboom, 1989) or food availability in rodents (Routtenberg and Kuznesof, 1967; Boakes and Dwyer, 1997). Considering the model of energy homeostasis, it is possible that this behaviour is related to an adjustment of body mass (Richard and Rivest, 1989), but at present, the underlying mechanism is subject to speculation (Lattanzio and Eikelboom, 2003).

The decrease in body temperatures observed at the beginning of the experiment in CON and NON groups may have been caused by the exercise itself, independent of the contingency, especially as no changes were observed in colonic temperatures of the SED group during this period. Although in this study rate metabolic was not measured, the reducing of colonic temperature as the progressive ratio increasing observed in CON group may have occurred to maintain a strategic body temperature at the expense of scarce amounts of energy, as happens during certain periods in nature, in winter, for example (Burns et al., 2006). The reduction in internal temperature as a strategy to reduce the basal metabolism during periods of low food availability has been observed in non-human primates (Lane et al., 1996), and several species of rodents subjected to various protocols of food restriction (Duffy et al., 1989; Severinsen and Munch, 1999; Speakman and Mitchell, 2011). Another factor associated with the availability of food, and which may also have contributed to the reduction in colonic temperature of the CON group, was the reduction in

body mass, which probably changed the relationship between body surface area/body mass ratio, thereby facilitating heat loss (Herrington, 1940). Both the reduction in body mass and the reduction of internal temperature are strategies to reduce basal metabolism and increase the chance of survival of the animal in periods with lower food availability and cold environments.

Aerobic capacity inferred by the maximum speed achieved in progressive test was not different between groups CON, NON and SED and was lower in the period after the experiment, including in the CON group, despite them having travelled long distances daily. These data suggest that there is no relationship between the performance achieved by the animals on a running wheel (with or without food contingency), and the progressive test (Lambert et al., 1996). Other investigators have described differences in energy cost and performance on a treadmill or a running wheel (Girard et al., 2001; Chappell et al. 2004).

Animals in nature may choose to move at various speeds and durations to increase the efficiency of their physical activity (Kenagy and Hoyt, 1989; Blumstein, 1992; Weinstein, 1995; Christian et al., 1997; Irschick and Jayne, 1999). Furthermore, unlike what happens in forced protocol exercise, several species, including humans, exhibit an intermittent locomotion, such as eastern chipmunks, *Tamias (Tamias) striatus* (Kramer and McLaughlin, 2001; Girard et al., 2001). These rodents spend, intermittently, around 41% of their time foraging with short breaks that may help in the identification of prey, avoiding predation and improving physical fitness (McAdam and Kramer, 1998).

All the above results suggest that the effects caused by the present contingent method in energy homeostasis are very different from those involved in forced exercise protocols traditionally used and, therefore, the present protocol should be included as another option in exercise physiology studies.

Food acquisition being contingent on physical activity is a laboratory method capable of simulating conditions more similar to those faced by animals in the wild, resulting in reduced body mass and thermoregulatory adjustments in a few days of an experiment to cope with food shortages. Our study showed that animals performed less exercise when there was no contingency between the behaviour they were expressing and the obtaining of food rewards.

## 382 MATERIALS AND METHODS

### 383 Ethical note

384 The research herein reported was approved by the Ethics Committee on Animal  
385 Experimentation (CETEA - Protocol 180/10) of the Federal University of Minas Gerais, Brazil.

### 386 Animals and housing conditions

387 Fifteen male Wistar rats from the vivarium of the Institute of Biological Sciences, of  
388 Federal University of Minas Gerais/Brazil, with approximately  $287.4 \pm 13.1$  g (5 to 7 weeks of  
389 age; mean  $\pm$  SD) at beginning of experiment were used as the experimental subjects; they  
390 were divided into three equal-sized groups: food-exercise contingent (CON), non-exercise  
391 contingent (NON) and sedentary (SED). During all phases of the experiment, rats had *ad*  
392 *libitum* access to water and food (note that in one group food was contingent upon  
393 performing physical activity). Throughout the whole experiment, rats were fed with  
394 Presence/Purina rodent pellets (gross energy 359.8kcal/gm, protein 23.8%, fat 5.2%,  
395 carbohydrate 54.6% and ash 6.2%). During the study, room temperature was maintained  
396 between 24 and 26°C. Rats were maintained on a 14-10 hour light-dark cycle (lights on at 05  
397 hours).

398 The animals of CON and NON groups were kept in individual activity cages (Gaustec  
399 LTDA, Belo Horizonte, Brazil - Figure 4) with internal dimensions 400 x 400 x 400 mm and  
400 external dimensions of 600 x 600 x 400 mm (height, length and width, respectively). The  
401 cages had an electronic interface for programming and storage of data (distance, mean  
402 speed and amount of food delivered per hour). A dispenser supplied food (see No. 3 in  
403 Figure 4). The dispenser was connected to a stainless steel box in which the animal had  
404 access to the food. This box had a false bottom to collect unconsumed food, which allowed  
405 the quantification of food consumed by the animal. The running wheel has 300 mm in  
406 diameter, 942 mm in circumference and mean torque of  $0.02 \pm 0.004$  Nm (mean $\pm$ SD) (3B  
407 Scientific Dynamometer U20032, precision 1N). The mean torque was measured before  
408 each phase. A motion sensor (encoder) attached to the wheel generated the values of  
409 distance and mean velocity, independent of the direction of wheel movement. The system  
410 was calibrated before all experiments and checked for drift after all experiments.

The SED group of rats were always kept in individual acrylic cages (length 290 mm, width 180 mm and height 120 mm of internal dimensions) without access to exercise throughout the experiment.

#### **Experimental design**

The experiment was divided into three phases: (1) all animals were maintained in individual cages, without access to exercise and food *ad libitum*, to provide measurements of food intake, colonic temperature and body mass in a baseline condition, during four to six days; (2) an adaptation phase to the use of the running wheel for groups CON and NON, with free access to exercise and food, during ten days; and (3) experimental conditions where the CON group was exposed to a progressive ratio (i.e., the required distance run to obtain the same amount of food was progressively increased) in terms of distance ran to obtain food; the NON group had free access to food and exercise. This phase lasted 42 to 45 days.

Five days before phase 1, a standard incremental-speed exercise test on a treadmill was used to characterize the animals. Therefore, all rats underwent familiarization and incremental running tests on a treadmill (Gaustec, Belo Horizonte, Brazil). First, the animals were subjected to a period of 5-8 consecutive days of familiarization on the treadmill. The rats remained 5 minutes with the treadmill off and another 5 minutes running at a speed of 18m/min with a 5% incline. The exercise was motivated by a mild electrical current (0.5 mA) from a grid at the back of the treadmill; this level of stimulation has previously been shown to motivate rats to run (Lima et al., 1998, Soares et al., 2003, 2004, Pires et al., 2007; Wanner et al., 2007). Second, a progressive test was performed after this familiarization period to determining each rat's maximum running speed. The initial test speed was 10 m/min, increased by 1 m/min every 2 minutes (Koch and Britton, 2001) until the animal remained touching the electrical grid for 10 consecutive seconds (normally the rats avoid being close to the electrical grid). This criterion has been used in previous studies from our laboratory (Lima et al., 1998, Soares et al., 2003, 2004, Pires et al., 2007; Wanner et al., 2007). The rats were matched for maximum speed achieved during the progressive test on a treadmill and divided into the three experimental groups aforementioned.

Phase 1 (-16 days): all animals were familiarized with colonic temperature measurement for a period of 4 to 6 days. Colonic temperature was measured using disposable probes (Yellow Spring Instruments, disposable rectal probe series USA 4400; accuracy 0.01°C) connected to a tele-thermometer (Yellow Spring Instruments). Before insertion of the probe, faeces were removed by means of a gentle massage; the external probe was lubricated with Vaseline gel and inserted 6 cm beyond the anal sphincter. The temperature was recorded for two minutes after insertion of the probe. Also carried out in this period, were measurements of daily food intake and body mass using weighing scales (accurate to 0.5 g; MF3 Filizola scale, São Paulo). The *ad libitum* food intake of the rats was calculated from five days of individual free access to the aforementioned diet, which was approximately  $23.70 \pm 0.28$  g/day or about 6 pellets/day (i.e., 24g/day).

Phase 2 (-10 days): after phase 1, the animals in groups CON and NON were maintained for 10 days in activity cages with free access to the running wheel, without its use being contingent upon food rewards. This familiarized them with the environment of the cage, running on a wheel and the feeding box.

Phase 3 (0 to 45 days): the distance travelled to obtain previously established *ad libitum* feeding level (i.e., 24g/day) was 1320 m and this was the starting level for the progressive ratio in the CON group (details on operant conditioning and progression ratios see McSweeney and Murphy, 2014). To generate the progressive ratio distances were increased on the previous level by 90% every three days (i.e., 1320 m, 2520 m, 3696 m, etc) until the animal reached the maximal daily distance (DD<sub>max</sub>) in the CON group. The criterion for determining DD<sub>max</sub> was a reduction of 15% to 20% in body weight (Perrigo and Bronson, 1983; Vaanholt et al., 2007). This limit to the reduction in body weight was chosen according to the results of Ferguson and Paule (1997), which showed no change in food seeking motivation when a reduction between 15 and 20% of body mass was applied.

After achieving the DD<sub>max</sub> (in 42 to 45 days depending on the individual), animals of all groups were again subjected to a period of familiarization on the treadmill for five days, and progressive test was performed again (to details, see above). This test was used again at the end of all experiments to provide baseline data to compare the impact of the



treatments on the rats running abilities and to verify if the results in performance using this progressive protocol are coherent with performance of rats in wheels.

The total duration of the experimental procedures was 75 days for all groups.

## **Animal management**

The animals were removed daily from their activity (CON and NON) or regular (SED) cages between 0900 and 1200 hrs and placed in individual acrylic cages (29 cm long, 18 cm wide and 12 cm high) for weighing, taking colonic temperature, reading exercise data and to clean cages.

## **Euthanasia**

The animals were killed by decapitation using a guillotine (Insight Equipment, Ribeirão Preto, São Paulo, Brazil) two days after the last progressive test. After euthanasia, we measured the length and mass of the right femur, and the final length of the animal. These measures were used to infer the growth of the animal. To measure the length of femurs a calliper accurate to 0.05 mm (Mitutoyo, Kawasaki, Japan) was used and the measurement was performed between the greater trochanter and the lateral and medial condyles. For weighing femurs an analytical balance was used (Mettler Toledo AL 204, accurate to 0.0001 g). The final length of the animals was measured from the first thoracic vertebra to the first vertebra of the tail.

The epididymal adipose tissue (EAT), the retroperitoneal adipose tissue (RAT) and the mesenteric adipose tissue (MAT) were collected and weighed separately to calculate the index of adiposity (Taylor and Phillips, 1996), according to the equation:

$$\text{Adiposity index (\%)} = (\text{EAT} + \text{RAT} + \text{MAT}) \times 100 / \text{body mass}$$

Immediately after euthanasia, samples of the epididymal adipose tissue were fixed in a PBS-buffered formaldehyde solution for 24 h prior to histological analysis. These samples were incubated in 70% ethanol prior to processing via routine paraffin embedding. Five - micrometer-long sections of the tissue were stained with haematoxylin and eosin. Images of the adipose tissue sections were captured using a digital camera coupled to a microscope and the area was measured under 10 x magnification using Image Pro-Plus software (Media

Cybernetics, USA). The area of 50 cells was measured in each animal using Image Pro-Plus software (Media Cybernetics, USA) and ImageJ (National Institutes of Health, Bethesda, Maryland, USA) was used to calculate mean adipocyte area, according Oliveira et al. (2013).

## Statistics

Data were found to meet the requirements for parametric statistics (Zar, 2010). Thus, we used two-way ANOVA with repeated measures to determine significant differences in responses between the experimental phases and treatment groups. For comparison of progressive tests performed before and after phase 3 and between groups, we used analysis of variance with two factors (groups and the pre/post phases). For variables related to growth and mass of tissue, analysis of covariance was used, considering the body mass or total length of the animal as a covariate. A *post hoc* Tukey's test was used to indicate significant differences. To verify the relationship between the distance travelled by the animal and the distance/food ratio a Pearson's correlation test was used for group CON. Data were presented as mean  $\pm$  standard error or mean  $\pm$  standard deviation. The level of significance was set at  $p < 0.05$  for all tests.

## ACKNOWLEDGEMENTS

Thanks to Gaustec LTDA and especially Cláudio Henrique Teixeira Ribeiro for developing the bespoke equipment used in this study.

## AUTHOR CONTRIBUTIONS

I.A.T.F., L.O.C.R. and R.J.Y. designed the experiment, wrote the manuscript and analysed the data. I.A.T.F., R.L.F.P, F.A.A., M.R.M.L., D.R.L., W.P. and D.D.S. collected the data, conducted the experiments and all contributed to both statistical analyses and reviewing of the manuscript.

## COMPETING INTERESTS

No competing interest declared.

## FUNDING

523           This project was funded by a research grant (BPD-00180-12) from FAPEMIG to  
524 L.O.C.R. I.A.T.F. was supported by a CAPES postgraduate scholarship. The participation of  
525 R.J.Y. was partially supported by a scholarship (*Pesquisador Mineiro*) from FAPEMIG.

526

## REFERENCES

- Afonso, V. M. and Eikelboom, R.** (2003). Relationship between wheel running, feeding, drinking, and body weight in male rats. *Physiol. Behav.* **80**, 19–26.
- Altemus, M., Glowa, J. R. and Murphy, D. L.** (1993). Attenuation of food-restriction-induced running by chronic fluoxetine treatment. *Psychopharmacol. Bull.* **29**, 397–400.
- Barcellos, L. A. M.** (2011). *Sistema serotoninérgico está envolvido na modulação da ingestão alimentar e massa corporal de maneira dependente da dieta e treinamento físico*. 102F. (Dissertação de mestrado apresentada no Programa de Pós-graduação em Ciências do Esporte) - EEEFTO-UFMG, Belo Horizonte.
- Belke, T. W., Pierce, W. D. and Jensen K.** (2004). Effect of short-term prefeeding and body weight on wheel running and responding reinforced by the opportunity to run in a wheel. *Behav. Processes* **67**, 1–10.
- Blumstein, D. T.** (1992). Multivariate analysis of golden marmot maximum running speed: a new method to study MRS in the field. *Ecology* **73**, 1757–1767.
- Boakes, R. and Dwyer, R. B. D.** (1997). Weight loss in rats produced by running: Effects of prior experience and individual housing. *Q. J. Exp. Psychol. Sect. B* **50**, 129–148.
- Burden, V. R., White, B. D., Dean, R. G. and Martin, R. J.** (1993). Activity of the hypothalamic-pituitary-adrenal axis is elevated in rats with activity-based anorexia. *J. Nutr.* **123**, 1217–1225.
- Burns, J. M., Williams, T. M., Secor, S. M., Owen-Smith, N., Bargmann, N. A. and Castellini, M. A.** (2006). New Insights into the physiology of natural foraging. *Physiol. Biochem. Zool.* **79**, 242–249.
- Castle, W. E.** (1947). The domestication of the rat. *Proc. Natl. Acad. Sci. U. S. A.* **33**, 109–117.
- Careau, V., Garland, Jr., T.** (2012). Performance, personality, and energetics: correlation, causation, and mechanism. *Physiol. Biochem. Zool.* **85**, 543–571.

- 552 **Challet, E., Pévet, P., Vivien-Roels, B., Malan, A.** (1997). Phase-advanced daily rhythms of  
 553 melatonin, body temperature, and locomotor activity in food-restricted rats fed during  
 554 daytime. *J Biol Rhythms*. **12**, 65-79.
- 555 **Chappell, M. A., Garland, Jr. T., Rezende, E. L. and Gomes, F. R.** (2004). Voluntary running in  
 556 deer mice: speed, distance, energy costs and temperature effects. *J. Exp. Biol.* **207**, 3839–  
 557 3854.
- 558 **Chappell, M. A., Garland, Jr. T., Robertson, G. F. and Saltzman, W.** (2007). Relationships  
 559 among running performance, aerobic physiology and organ mass in male Mongolian  
 560 gerbils. *J. Exp. Biol.* **210**, 4179–4197.
- 561 **Christian, K. A., Baudinette, R. V. and Pamula, Y.** (1997). Energetic costs of activity by  
 562 lizards in the field. *Funct. Ecol.* **11**, 392–397.
- 563 **Collier, G. H.** (1970). Work: a weak reinforcer. *Trans. N. Y. Acad. Sci.* **32**, 557–576.
- 564 **Cortright, R. N., Chandler, M. P., Lemon, P. W. and DiCarlo, S. E.** (1997). Daily exercise  
 565 reduces fat, protein and body mass in male but not female rats. *Physiol. Behav.* **62**, 105–  
 566 111.
- 567 **Dewsbury, D. A.** (1980). Wheel-running behavior in 12 species of muroid rodents. *Behav.*  
 568 *Processes* **5**, 271–280.
- 569 **Dohm, M. R., Richardson, C. S. and Garland, Jr. T.** (1994). Exercise physiology of wild and  
 570 random-bred laboratory house mice and their reciprocal hybrids. *Am. J. Physiol.-Regul.*  
 571 *Integr. Comp. Physiol.* **267**, R1098–R1108.
- 572 **Duffy, P. H., Feuers, R. J., Leakey, J. A., Nakamura, K. D., Turturro, A. and Hart, R. W.**  
 573 (1989). Effect of chronic caloric restriction on physiological variables related to energy  
 574 metabolism in the male Fischer 344 rat. *Mech. Ageing Dev.* **48**, 117–133.
- 575 **Duffy, P. H., Leakey, J. E., Pipkin, J. L., Turturro, A., Hart, R. W.** (1997). The  
 576 physiologic, neurologic, and behavioral effects of caloric restriction related to aging,  
 577 disease, and environmental factors. *Environ. Res.* **73**, 242-248.
- 578 **Ferguson, S. A. and Paule, M. G.** (1997). Progressive ratio performance varies with body  
 579 weight in rats. *Behav. Processes* **40**, 177–182.

- 580 **Fleshner, L.B.; Spencer, M.; Moore, R.L.** (2007). Short-term treadmill running in the rat:  
 581 what kind of stressor is it? *J. App. Physiol.* **103**, 1979–1985.
- 582 **Garland, Jr. T., Kelly, S. A., Malisch, J. L., Kolb, E. M., Hannon, R. M., Keeney, B. K., Van**  
 583 **Cleave, S. L. and Middleton, K. M.** (2011). How to run far: multiple solutions and sex-  
 584 specific responses to selective breeding for high voluntary activity levels. *Proc. Royal Soc.*  
 585 *B: Biol. Sci.* **278**, 574–581.
- 586 **Gelegen, C.; Collier, D. A.; Campbell, I. C.; Oppelaar, H.; Kas, M. J.** (2006). Behavioral,  
 587 physiological, and molecular differences in response to dietary restriction in three inbred  
 588 mouse strains. *Am. J. Physiol. Endoc. Metab.* **291**, E574–E581.
- 589 **Girard, I., McAleer, M. W., Rhodes, J. S. and Garland, Jr. T.** (2001). Selection for high  
 590 voluntary wheel-running increases speed and intermittency in house mice (*Mus*  
 591 *domesticus*). *J. Exp. Biol.* **204**, 4311–4320.
- 592 **Goodrick, C. L., Ingram, D. K., Reynolds, M. A., Freeman, J. R. and Cider, N. L.** (1983).  
 593 Differential effects of intermittent feeding and voluntary exercise on body weight and  
 594 lifespan in adult rats. *J. Gerontol.* **38**, 36–45.
- 595 **Herrington, L. P.** (1940). The heat regulation of small laboratory animals at various  
 596 environmental temperatures. *Am. J. Physiol. Content.* **129**, 123–139.
- 597 **Hill, J. O., Latiff, A. and DiGirolamo, M.** (1985). Effects of variable caloric restriction on  
 598 utilization of ingested energy in rats. *Am. J. Physiol.-Regul. Integr. Comp. Physiol.* **248**,  
 599 R549–R559.
- 600 **Houston, A. I.; McNamara, J. M.** (1989). The value of food: effects of open and closed  
 601 economies. *Anim. Behav.* **37**, 546–562.
- 602 **Inglis, I. R., Langton, R., Forkman, B. and Lazarus, J.** (2001). An information primacy model  
 603 of exploratory and foraging behaviour. *Anim. Behav.* **62**, 543–557.
- 604 **Irschick, D. J. and Jayne, B. C.** (1999). A field study of the effects of incline on the escape  
 605 locomotion of a bipedal lizard, *Callisaurus draconoides*. *Physiol. Biochem. Zool.* **72**, 44–56.

- 606 **Kanarek, R. B., D'Anci, K. E., Jurdak, N. and Mathes, W. F.** (2009). Running and addiction:  
 607 precipitated withdrawal in a rat model of activity-based anorexia. *Behav. Neurosci.* **123**,  
 608 905-912.
- 609 **Kenagy, G. J. and Hoyt, D. F.** (1989). Speed and time-energy budget for locomotion in  
 610 golden-mantled ground squirrels. *Ecology* **70**, 1834–1839.
- 611 **Koch, L. G. and Britton, S. L.** (2001). Artificial selection for intrinsic aerobic endurance  
 612 running capacity in rats. *Physiol. Genomics* **5**, 45–52.
- 613 **Kramer, D. L. and McLaughlin, R. L.** (2001). The behavioral ecology of intermittent  
 614 locomotion. *Am. Zool.* **41**, 137–153.
- 615 **Krebs, J. R., Davies, N. B. and West, S. A.** (2012). *Introduction to Behavioural Ecology*. Wiley-  
 616 Blackwell, Oxford, 2012.
- 617 **Lacerda, D. R.** (2012). Efeito do treinamento físico no esqueleto de ratas com obesidade  
 618 associada à ovariectomia. 182F. (Dissertação de mestrado apresentada no Programa de  
 619 Pós-graduação em Ciências do Esporte) - EEEFTO-UFMG, Belo Horizonte.
- 620 **Lambert, M. I. and Noakes, T. D.** (1990). Spontaneous running increases VO<sub>2</sub>max and  
 621 running performance in rats. *J. Appl. Physiol.* **68**, 400–403.
- 622 **Lambert, M. I., Van Zyl, C., Jaunky, R., Lambert, E. V. and Noakes, T. D.** (1996). Tests of  
 623 running performance do not predict subsequent spontaneous running in rats. *Physiol.*  
 624 *Behav.* **60**, 171–176.
- 625 **Lane, M. A., Baer, D. J., Rumpler, W. V., Weindruch, R., Ingram, D. K., Tilmont, E. M.,**  
 626 **Cutler, R. G. and Roth, G. S.** (1996). Calorie restriction lowers body temperature in rhesus  
 627 monkeys, consistent with a postulated anti-aging mechanism in rodents. *Proc. Natl. Acad.*  
 628 *Sci.* **93**, 4159–4164.
- 629 **Lattanzio, S. B. and Eikelboom, R.** (2003). Wheel access duration in rats: I. Effects on  
 630 feeding and running. *Behav. Neurosci.* **117**, 496-504.
- 631 **Lemon, W. C.; Barth, R. H.** (1992). The effects of feeding rate on reproductive success in the  
 632 zebra finch, *Taeniopygia guttata*. *Anim. Behav.* **44**, 51-857.

- 633 **Lima, N. R., Coimbra, C. C. and Marubayashi, U.** (1998). Effect of intracerebroventricular  
 634 injection of atropine on metabolic responses during exercise in untrained rats. *Physiol.*  
 635 *Behav.* **64**, 69–74.
- 636 **Looy, H. and Eikelboom, R.** (1989). Wheel running, food intake, and body weight in male  
 637 rats. *Physiol. Behav.* **45**, 403–405.
- 638 **Mazur, J. E.** (2002). Learning and behavior. Prentice-Hall Pearson, Upper Saddle River, NJ.
- 639 **McAdam, A. G. and Kramer, D. L.** (1998). Vigilance as a benefit of intermittent locomotion  
 640 in small mammals. *Anim. Behav.* **55**, 109–117.
- 641 **McSweeney, K., Murphy, E. S.** (2014). The Wiley-Blackwell Handbook of Operant and  
 642 Classical Conditioning. Wiley, Oxford, UK.
- 643 **Meijer, J.H. and Robbers, Y.** (2014). Wheel running in the wild. *Proc. Royal Soc. B: Biol. Sci.*  
 644 **281**, 20140210–20140210.
- 645 **Mondon, C. E., Dolkas, C. B., Sims, C. and Reaven, G. M.** (1985). Spontaneous running  
 646 activity in male rats: effect of age. *J. Appl. Physiol.* **58**, 1553–1557.
- 647 **Novak, C. M., Burghardt, P. R. and Levine, J. A.** (2012). The use of a running wheel to  
 648 measure activity in rodents: relationship to energy balance, general activity, and reward.  
 649 *Neurosci. Biobehav. Rev.* **36**, 1001–1014.
- 650 **O'Connor, R. and Eikelboom, R.** (2000). The effects of changes in housing on feeding and  
 651 wheel running. *Physiol. Behav.* **68**, 361–371.
- 652 **Oliveira M. C., Menezes-Garcia Z., Henriques M. C., Soriani F. M., Pinho V., Faria A. M.,**  
 653 **Santiago A. F., Cara D. C., Souza D. G., Teixeira M. M., Ferreira A. V.** (2013). Acute and  
 654 sustained inflammation and metabolic dysfunction induced by high refined carbohydrate-  
 655 containing diet in mice. *Obesity.* **21**, E396–406.
- 656 **Overton, J. M., Williams, T. D.** (2004). Behavioral and physiologic responses to caloric  
 657 restriction in mice. *Physiol. Behav.* **81**, 749–754.
- 658 **Perrigo, G. and Bronson, F. H.** (1983). Foraging effort, food intake, fat deposition and  
 659 puberty in female mice. *Biol. Reprod.* **29**, 455–463.



- 660 **Pires, W., Wanner, S. P., La Guardia, R. B., Rodrigues, L. O., Silveira, S. A., Coimbra, C. C.,**  
 661 **Marubayashi, U. and Lima, N. R.** (2007). Intracerebroventricular physostigmine enhances  
 662 blood pressure and heat loss in running rats. *J. Physiol. Pharmacol. Off. J. Pol. Physiol.*  
 663 *Soc.* **58**, 3-17.
- 664 **Pitts, G. C.** (1984). Body composition in the rat: interactions of exercise, age, sex, and diet.  
 665 *Am. J. Physiol.-Regul. Integr. Comp. Physiol.* **246**, R495–R501.
- 666 **Rezende, E.L., Kelly, S.A., Gomes, F.R., Chappell, M.A., and Garland, T. Jr.** (2006). Effects of  
 667 Size, Sex, and Voluntary Running Speeds on Costs of Locomotion in Lines of Laboratory  
 668 Mice Selectively Bred for High Wheel-Running Activity. *Physiol. Biochem. Zool.* **79**, 83-99.
- 669 **Richard, D., Rivest, S.** (1989). The role of exercise in thermogenesis and energy balance. *Can*  
 670 *J Physiol Pharm.* **67**, 402– 409.
- 671 **Routtenberg, A. and Kuznesof, A. W.** (1967). Self-starvation of rats living in activity wheels  
 672 on a restricted feeding schedule. *J. Comp. Physiol. Psychol.* **64**, 414-421.
- 673 **Rowland, N. E., Vaughan, C. H., Mathes, C. M. and Mitra, A.** (2008). Feeding behavior,  
 674 obesity, and neuroeconomics. *Physiol. Behav.* **93**, 97–109.
- 675 **Russel, J. C., Epling, W. F., Pierre, D., Amy, R. M., Boer, D. P.** (1987). Induction of voluntary  
 676 prolonged running by rats. *J. Appl. Physiol.* **63**, 2549–2553.
- 677 **Severinsen, T. and Munch, I. C.** (1999). Body core temperature during food restriction in  
 678 rats. *Acta Physiol. Scand.* **165**: 299–305.
- 679 **Shamoun-Baranes, J.; van Loon, E.** (2006). Energetic influence on gull flight strategy  
 680 selection. *J. Exp. Biol.* **209**, 3489-3498.
- 681 **Sherwin, C. M.** (1998). Voluntary wheel running: a review and novel interpretation. *Anim.*  
 682 *Behav.* **56**, 11–27.
- 683 **Soares, D. D., Lima, N. R. V., Coimbra, C. C. and Marubayashi, U.** (2003). Evidence that  
 684 tryptophan reduces mechanical efficiency and running performance in rats. *Pharmacol.*  
 685 *Biochem. Behav.* **74**, 357–362.

- 686 **Soares, D. D., Lima, N. R. V., Coimbra, C. C. and Marubayashi, U.** (2004).  
 687 Intracerebroventricular tryptophan increases heating and heat storage rate in exercising  
 688 rats. *Pharmacol. Biochem. Behav.* **78**, 255–261.
- 689 **Speakman, J. R. and Mitchell, S. E.** (2011). Caloric restriction. *Mol. Aspects Med.* **32**, 159–  
 690 221.
- 691 **Stevenson, J. A. F., Box, B. M., Feleki, V., Beaton, J. R.** (1966). Bouts of exercise and food  
 692 intake in the rat. *J. Appl. Physiol.* **21**, 118–122.
- 693 **Stubbs, R. J., Sepp, A., Hughes, D. A., Johnstone, A. M., Horgan, G. W., King, N. A. and**  
 694 **Blundell, J. E.** (2002). The effect of graded levels of exercise on energy intake and balance  
 695 in free-living men, consuming their normal diet. *Eur. J. Clin. Nutr.* **56**, 129–140.
- 696 **Swallow, J. G., Hayes, J. P., Koteja, P. and Garland Jr. T.** (2009). Selection experiments and  
 697 experimental evolution of performance and physiology. In: *Experimental evolution:*  
 698 *concepts, methods, and applications of selection experiments* (ed. Garland, JR. T.; Rose,  
 699 M. R), pp. 301–351. University of California Press, Berkeley, California.
- 700 **Taylor, B. A. and Phillips S. J.** (1996). Detection of obesity QTLs on mouse chromosomes 1  
 701 and 7 by selective DNA pooling. *Genomics*, **34**, 389–398.
- 702 **Tokuyama, K., Saito, M. and Okuda, H.** (1982). Effects of wheel running on food intake and  
 703 weight gain of male and female rats. *Physiol. Behav.* **28**, 899–903.
- 704 **Vaanholt, L. M., De Jong, B., Garland, Jr. T., Daan, S. and Visser, G. H.** (2007). Behavioural  
 705 and physiological responses to increased foraging effort in male mice. *J. Exp. Biol.* **210**,  
 706 2013–2024.
- 707 **Wanner, S. P., Guimarães, J. B., Rodrigues, L. O. C., Marubayashi, U., Coimbra, C. C. and**  
 708 **Lima, N. R.** (2007). Muscarinic cholinergic receptors in the ventromedial hypothalamic nucleus  
 709 facilitate tail heat loss during physical exercise. *Brain Res. Bull.* **73**, 28–33.
- 710 **Weinstein, R. B.** (1995). Locomotor behavior of nocturnal ghost crabs on the beach: focal  
 711 animal sampling and instantaneous velocity from three-dimensional motion analysis. *J.*  
 712 *Exp. Biol.* **198**, 989–999.

**Young, R. J.** (1997). The importance of food presentation for animal welfare and conservation. *Proc. Nut. Soc.*, **56**, 1095-1104.

**Young, R. J.** (2003). Environmental Enrichment for Captive Animals. Oxford: Blackwell Science.

**Young, R. J.; Lawrence, A. B.** (1996). The effects of high and low rates of food reinforcement on the behaviour of pigs. *Appl. Anim. Behav. Sci.* **49**, 365-374.

**Zar, J. H.** (2010). Biostatistical Analysis. Prentice-Hall/Pearson, Upper Saddle River, NJ.

## LEGENDS

**Fig. 1. Measured variables in phase 1 (P1; -16 days), in phase 2 (P2; -10 days) and then every three days, in contingent (CON), non-exercise contingent (NON) and sedentary (SED) groups (P3 – phase 3).** Data are presented as mean  $\pm$  standard error. 2a) Mean distance travelled (m); 2b) Mean body mass (g); and 2c) Mean food intake (g). The dotted line in the graph represents the distance that must be travelled to obtain *ad libitum* feeding levels (approximately 24g of food per day). The letter "a" indicates the difference between the groups with and without contingency, letter "b" indicates difference between groups contingency and sedentary, the letter "c" indicates the difference between the running-food contingent group (CON) and the other groups, the letter "d" indicates the difference between the sedentary group and the others ( $p < 0.05$ ). The horizontal bar at the bottom of the graph indicates the different experimental phases.

**Fig. 2. Colonic temperature ( $^{\circ}\text{C}$ ) depending on the day of the experiment in contingent (CON), non-exercise contingent (NON) and sedentary (SED) groups.** Data are presented as mean  $\pm$  standard error. "a" indicates difference between groups food-exercise contingent and sedentary groups. The letter "b" indicates the difference between the food-exercise contingent (NON) and the other groups ( $p < 0.05$ ). The horizontal bar at the bottom of the graph indicates the different experimental phases (1 to 3).

**Fig. 3. Adiposity index (A) and adipocyte area (B) of epididymal adipose tissue for contingent (CON), non-exercise contingent (NON) and sedentary (SED) groups.** Epididymal adipose tissue histology analysis - HE: Bar: 50µm. C: contingent group; D: non-exercise contingent group; E: sedentary group. Data are presented as mean ± standard deviation. \*indicates difference between NON and SED groups ( $p < 0.05$ ).

**Fig. 4. Photograph of the activity cage that allowed a contingency between the exercise performed and the amount of food earned.** 1: electronic interface for programming and storage of data (distance (m), mean speed (m/min), maximum speed (m/min), maximum feed pellets available and number of pellets delivered); 2: running wheel; 3: electronic food dispenser; 4: feeding box.

751 Table 1. Maximum speed (m/min) and duration (min) of progressive tests, undertaken by  
 752 the experimental rats, before (PRE) and after (POST) the experimental phase (phase 3)

|     | MAXIMAL SPEED |            | DURATION  |            |
|-----|---------------|------------|-----------|------------|
|     | PRE           | POST       | PRE       | POST       |
| CON | 31.0±3.9      | 16.6±5.9*  | 42.0±7.9  | 14.2±11.2* |
| NON | 29.0±4.1      | 22.4±10.1* | 38.8±7.8  | 25.8±20.4* |
| SED | 27.3±8.3      | 25.6±18.4* | 34.5±16.6 | 31.8±36.2* |

753 Data are presented as mean ± standard deviation. CON: contingent group; NON: non-  
 754 exercise contingent group and SED: sedentary group. \*Denotes a significant difference  
 755 between the pre and post conditions ( $p < 0.05$ ).

Table 2. Wet tissue masses (g) and length of right femur (mm) of the experimental rats and adjusted means from ANCOVA using body length as covariate.

|                       | CON                         | NON                         | SED                         |
|-----------------------|-----------------------------|-----------------------------|-----------------------------|
| Body length           | 162.50 ± 4.90               | 172.40 ± 4.40               | 162.50 ± 4.90               |
| Brown adipose tissue  | 0.19±0.02 <sup>a</sup>      | 0.32±0.11 <sup>b</sup>      | 0.35±0.09 <sup>b</sup>      |
| Adjusted means        | 0.20 ± 0.04 <sup>a</sup>    | 0.31 ± 0.04 <sup>a</sup>    | 0.33 ± 0.04 <sup>a</sup>    |
| Liver                 | 7.50±1.73 <sup>a</sup>      | 12.52±1.08 <sup>b</sup>     | 12.10±0.89 <sup>b</sup>     |
| Adjusted means        | 7.88 ± 0.56 <sup>a</sup>    | 12.82 ± 0.53 <sup>b</sup>   | 12.02 ± 0.56 <sup>b</sup>   |
| Heart                 | 0.94±0.10 <sup>a</sup>      | 1.34±0.13 <sup>b</sup>      | 1.22±0.11 <sup>b</sup>      |
| Adjusted means        | 0.90 ± 0.06 <sup>a</sup>    | 1.33 ± 0.05 <sup>b</sup>    | 1.18 ± 0.06 <sup>b</sup>    |
| Right gastrocnemius   | 1.66±0.16 <sup>a</sup>      | 2.57±0.16 <sup>b</sup>      | 2.25±0.07 <sup>c</sup>      |
| Adjusted means        | 1.67 ± 0.08 <sup>a</sup>    | 2.58 ± 0.08 <sup>b</sup>    | 2.25 ± 0.08 <sup>c</sup>    |
| Right Soleus          | 0.15±0.02 <sup>a</sup>      | 0.19±0.03 <sup>a</sup>      | 0.16±0.04 <sup>a</sup>      |
| Adjusted means        | 0.16 ± 0.02 <sup>a</sup>    | 0.18 ± 0.02 <sup>a</sup>    | 0.16 ± 0.02 <sup>a</sup>    |
| Adrenal Gland         | 0.02±0.01 <sup>a</sup>      | 0.03±0.01 <sup>b</sup>      | 0.02±0.01 <sup>a</sup>      |
| Adjusted means        | 0.016 ± 0.003 <sup>a</sup>  | 0.028 ± 0.003 <sup>b</sup>  | 0.020 ± 0.003 <sup>ab</sup> |
| Mass of right femur   | 1.57±0.25 <sup>a</sup>      | 1.46±0.30 <sup>a</sup>      | 1.66±0.30 <sup>a</sup>      |
| Adjusted means        | 1.60 ± 0.16 <sup>a</sup>    | 1.47 ± 0.16 <sup>a</sup>    | 1.69 ± 0.16 <sup>a</sup>    |
| Length of right femur | 37.60 ± 0.50 <sup>a</sup>   | 39.20 ± 0.70 <sup>b</sup>   | 39.90 ± 1.00 <sup>b</sup>   |
| Adjusted means        | 38.00 ± 0.40 <sup>a</sup>   | 38.90 ± 0.40 <sup>ab</sup>  | 40.20 ± 0.40 <sup>b</sup>   |
| Body mass             | 269.20 ± 7.00 <sup>a</sup>  | 413.40 ± 13.20 <sup>b</sup> | 426.90 ± 7.70 <sup>b</sup>  |
| Adjusted means        | 272.70 ± 12.20 <sup>a</sup> | 415.10 ± 11.60 <sup>b</sup> | 428.10 ± 12.20 <sup>b</sup> |

Data presented as mean ± standard deviation. Data of brown adipose tissue, liver, heart, right gastrocnemius, soleus and adrenal gland were multiplied by 1000. CON: contingent group; NON: non-exercise contingent and SED: sedentary group. Different letters denote significant differences between groups (p<0.05).

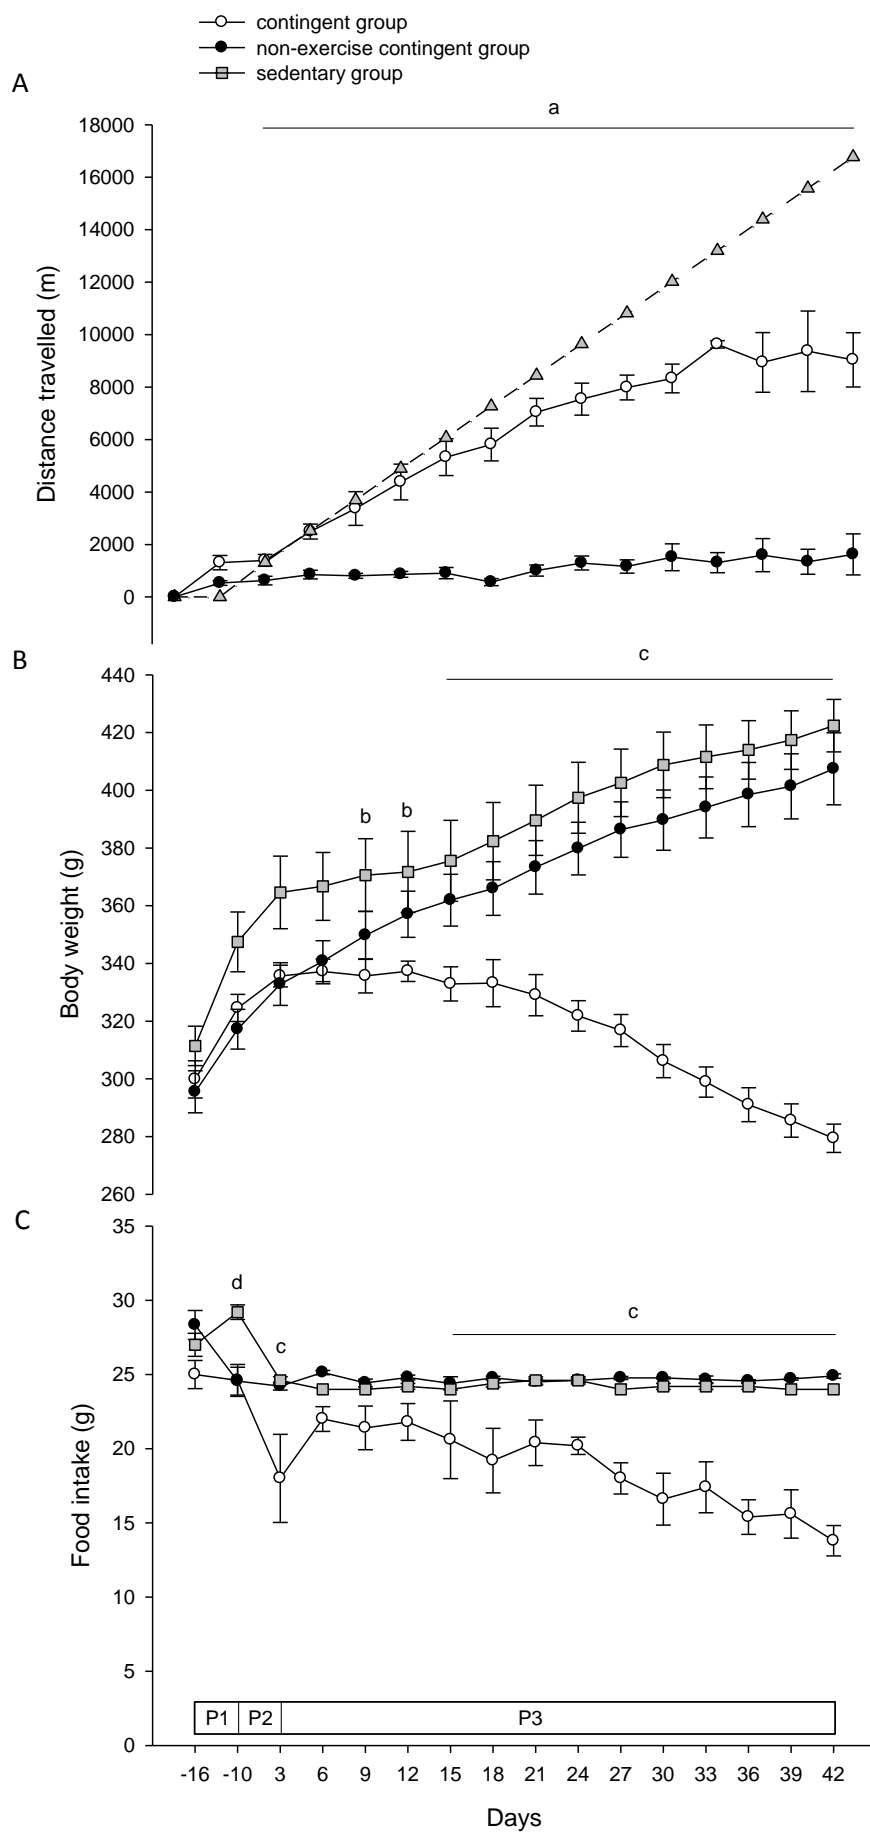





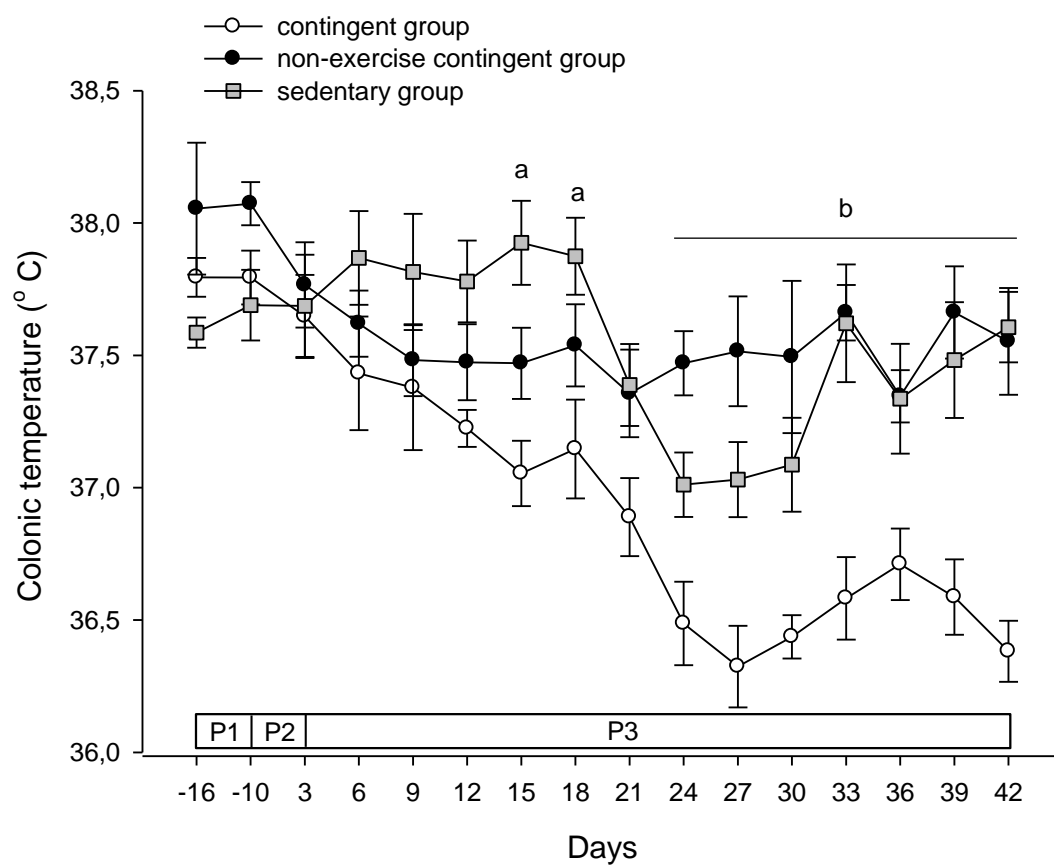

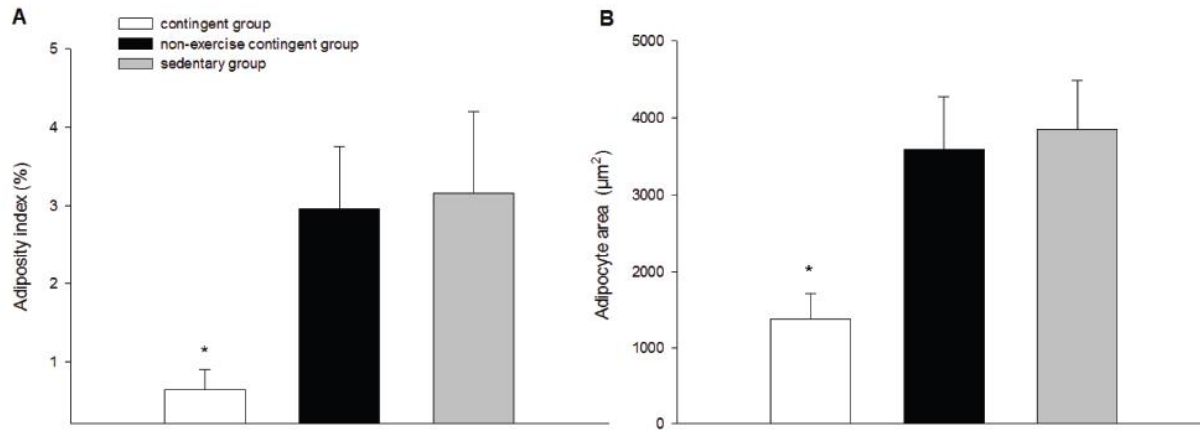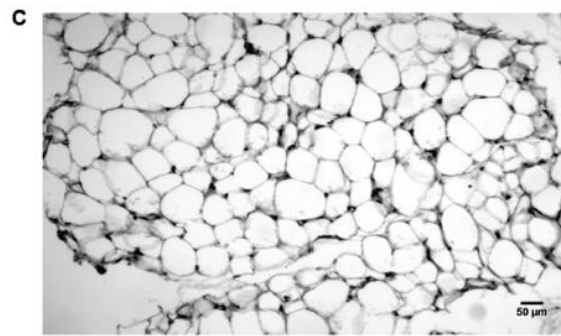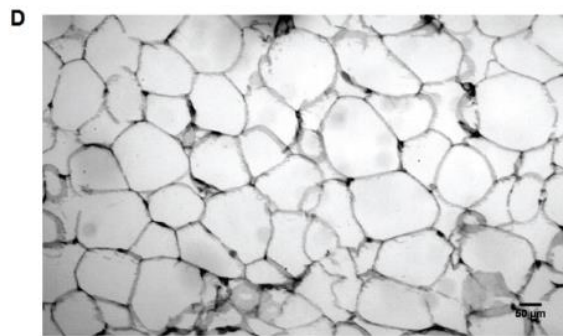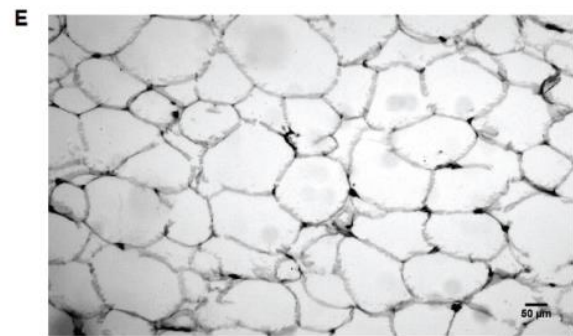

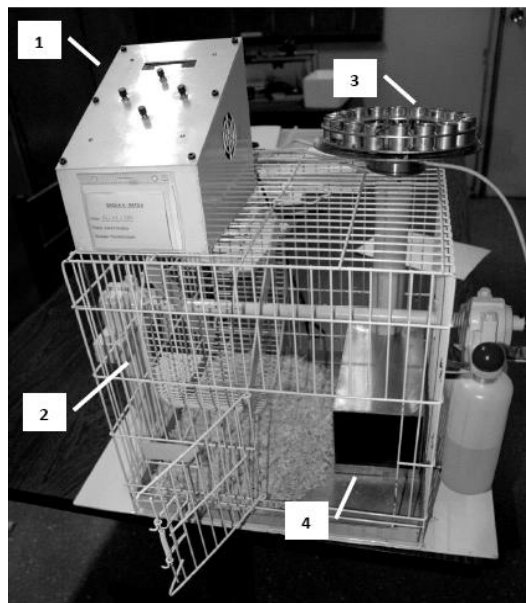

Source: https://cob.silverchair.com/jeb/article-pdf/doi/10.1242/jeb.108191/2038236/jeb_108191.pdf
